# Supplementary material for: Arabidopsis response to the spider mite Tetranychus urticae depends on the regulation of reactive oxygen species homeostasis
Source: PubMed Central journal article supplement (PMC6013483; doi:10.1038/s41598-018-27904-1), 2018-06-21
Supplement: 41598_2018_27904_MOESM1_ESM.pdf [file 41598_2018_27904_MOESM1_ESM.pdf]

## **Supplementary Information**

**Arabidopsis response to the spider mite *Tetranychus urticae* depends on the regulation of reactive oxygen species homeostasis**

M Estrella Santamaría, Ana Arnaiz, Blanca Velasco-Arroyo, Vojislava Grbic, Isabel Diaz, Manuel Martinez

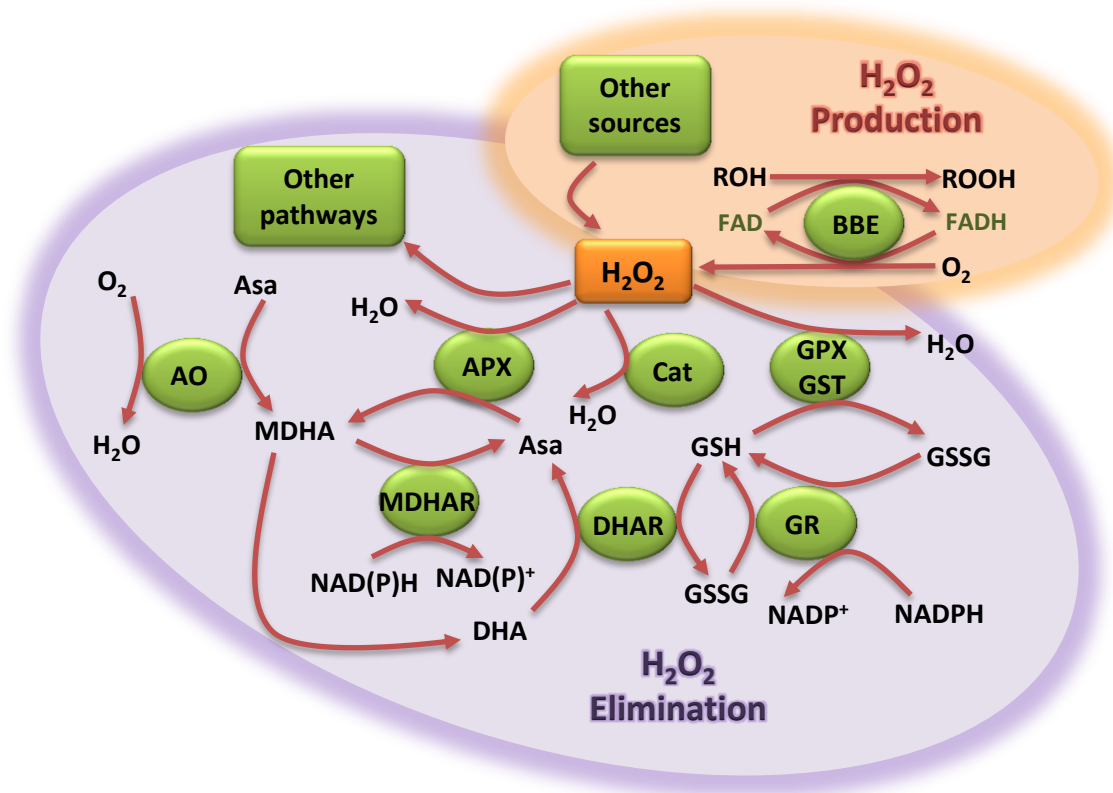

**Supplementary Figure 1. Schematic representation of the metabolic pathways leading to H<sub>2</sub>O<sub>2</sub> production and elimination.** For clarity, a simplified metabolic network was done with a special focus on the molecules analysed in this work. H<sub>2</sub>O<sub>2</sub>, hydrogen peroxide; Asa, ascorbate; (M)DHA, (mono)dehydroascorbate; GSH, glutathione; GSSG, glutathione disulphide; BBE, berberine-like enzyme; GST, glutathione transferase; GPX, glutathione peroxidase; AO, ascorbate oxidase; Cat, catalase; GR, glutathione reductase; (M)DHAR, (mono)dehydroascorbate reductase; APX, ascorbate peroxidase; NAD(P), nicotinamide adenine dinucleotide (phosphate); FAD, flavin adenine dinucleotide.

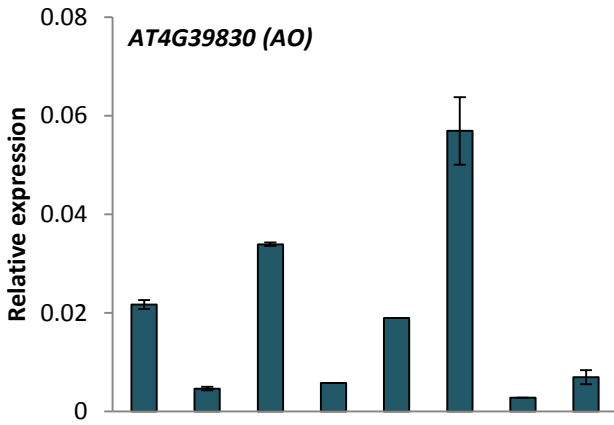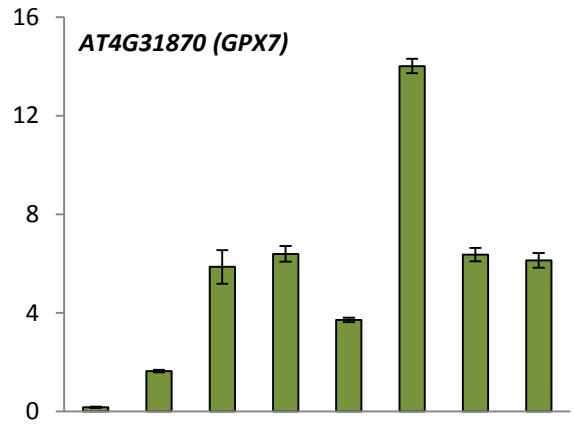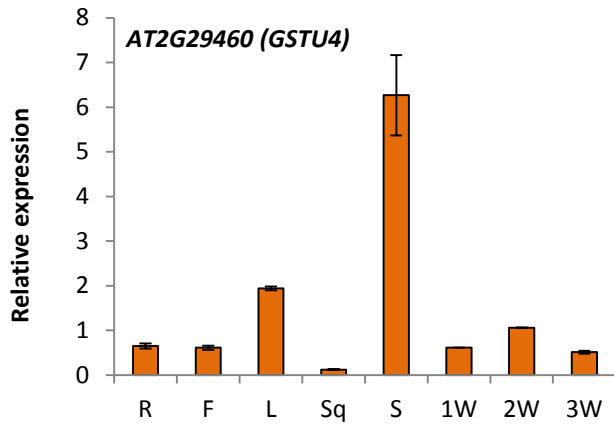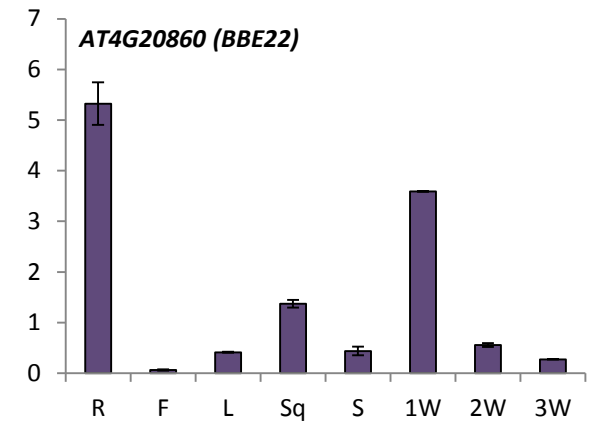

**Supplementary Figure 2. Gene expression in plant tissues.** Relative gene expression levels ( $2^{-\Delta\text{Ct}}$ ) of *AT4G39830*, *AT4G31870*, *AT2G29460* and *AT4G20860* in different *Arabidopsis* tissues. Roots (R), flowers (F), leaves from stem (L), siliques (Sq), seeds (S) and rosettes from 1, 2 and 3 week-old (1W, 2W, 3W). Ubiquitin was used to normalize gene expression.

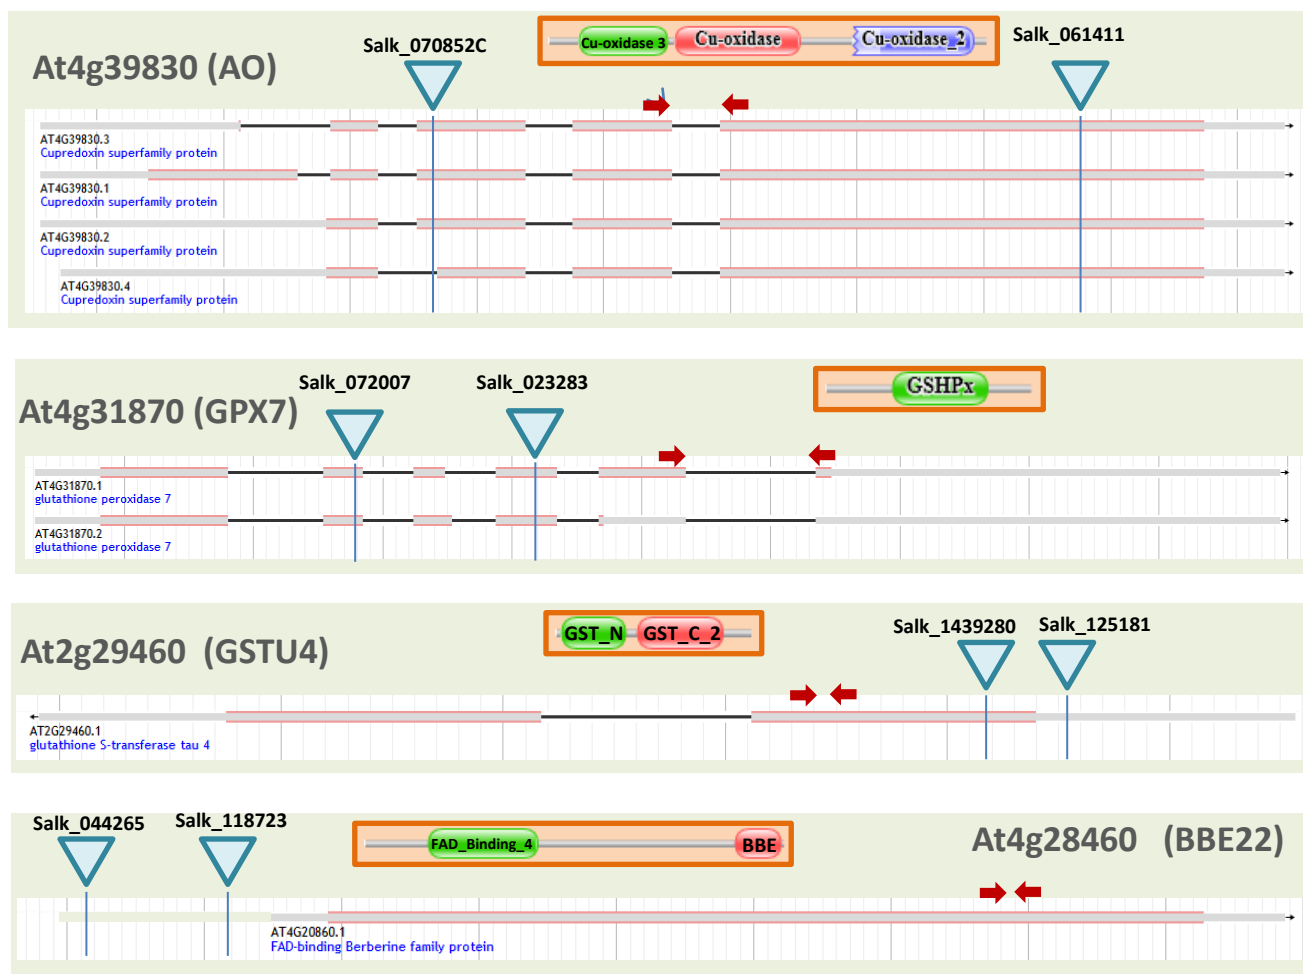

**Supplementary Figure 3. Structural information of selected Arabidopsis genes.** A schematic representation of protein domains is shown above the genomic structure of each gene (exons, grey boxes; introns, black lines; coding region, grey-red boxes). Red arrows mark the position of oligonucleotides used in RT-qPCR experiments. Blue triangles point to the gene location in which the T-DNA was inserted.

**Supplemental Table 1.** Fold change of the expression of ROS-related genes in T-DNA insertion lines.

| T-DNA line       | Fold change $\pm$ standard error |                 |                 |                  |
|------------------|----------------------------------|-----------------|-----------------|------------------|
|                  | <i>AO</i>                        | <i>GPX7</i>     | <i>GSTU4</i>    | <i>BBE22</i>     |
| <b>AO KD1</b>    | 0.40 $\pm$ 0.02                  | 1.12 $\pm$ 0.04 | 1.33 $\pm$ 0.17 | 2.69 $\pm$ 0.39  |
| <b>AO KD2</b>    | 0.65 $\pm$ 0.04                  | 0.83 $\pm$ 0.02 | 1.10 $\pm$ 0.24 | 1.98 $\pm$ 0.04  |
| <b>GPX7 KD</b>   | 0.53 $\pm$ 0.01                  | 0.68 $\pm$ 0.01 | 1.02 $\pm$ 0.14 | 2.16 $\pm$ 0.37  |
| <b>GPX7 KO</b>   | 1.85 $\pm$ 0.13                  | 0.00 $\pm$ 0.00 | 0.23 $\pm$ 0.04 | 1.17 $\pm$ 0.10  |
| <b>GSTU4 KD1</b> | 0.69 $\pm$ 0.10                  | 0.67 $\pm$ 0.02 | 0.11 $\pm$ 0.07 | 1.30 $\pm$ 0.08  |
| <b>GSTU4 KD2</b> | 0.42 $\pm$ 0.03                  | 0.88 $\pm$ 0.01 | 0.09 $\pm$ 0.05 | 1.31 $\pm$ 0.10  |
| <b>BBE22 KO</b>  | 0.17 $\pm$ 0.03                  | 0.55 $\pm$ 0.01 | 0.74 $\pm$ 0.21 | 0.03 $\pm$ 0.01  |
| <b>BBE22 OE</b>  | 0.49 $\pm$ 0.02                  | 0.82 $\pm$ 0.06 | 2.11 $\pm$ 0.19 | 29.95 $\pm$ 2.82 |

**Supplemental Table 2.** Sequences of used oligonucleotides (F: forward; R: reverse).

| <b>Gene</b> | <b>Primer name</b> | <b>Sequence (5' → 3')</b> |
|-------------|--------------------|---------------------------|
| Ubiquitin   | UBQ-F              | GCTCTTATCAAAGGACCTTCGG    |
|             | UBQ-R              | CGAACTTGAGGAGGTTGCAAAG    |
| AT4G39830   | AO-F               | TTCCCGGAAAGACATACAGG      |
|             | AO-R               | TCCGTCTGCTTCAACAACG       |
| AT4G31870   | GPX7-F             | AGGGCAAAGTTGTCGAGAGA      |
|             | GPX7-R             | TTAAGCCGCAAGCAACTTCT      |
| AT2G29460   | GSTU4-F            | AGATTTCTTCGGTGGCAAAA      |
|             | GSTU4-R            | ATTCCCATACCTCCCAACC       |
| AT4G20860   | BBE22-F            | TTTCTAAATCGCCGAGAGGA      |
|             | BBE22-R            | TTGCATCTTCGAAACTCGTG      |
| AT1G64280   | NPR1-F             | TGCATCAGAAGCAACTTTGG      |
|             | NPR1-R             | GGCCTTTGAGAGAATGCTTG      |
| AT2G14610   | PR1-F              | TCAGTGAGACTCGGATGTGC      |
|             | PR1-R              | CGTTCACATAATTCCCACGA      |
| AT1G32640   | MYC2-F             | TCCGAGTCCGGTTCATTCT       |
|             | MYC2-R             | TCTCGGGAGAAAGTGTATTGAA    |
| AT5G24770   | VSP2-F             | ATGCCAAAGGACTTGCCCTA      |
|             | VSP2-R             | CGGGTCGGTCTTCTCTGTTC      |
| AT5G44420   | PDF1.2-F           | GTTCTCTTTGCTGCTTTCGAC     |
|             | PDF1.2-R           | GCAAACCCCTGACCATGT        |
